# Supplementary material for: Suppression of Aedes albopictus (Diptera: Culicidae) populations using the boosted sterile insect technique in Greece
Source: Research Square preprint supplement (doi:10.21203/rs.3.rs-7065292/v1), 2025-08-12
Supplement: Supplementary file 1 [file 19756065d8860855b9dbe281.docx]

## **Supplementary Information**

## **Goodness of fit of the spatial Poisson models**

## **Eggs**


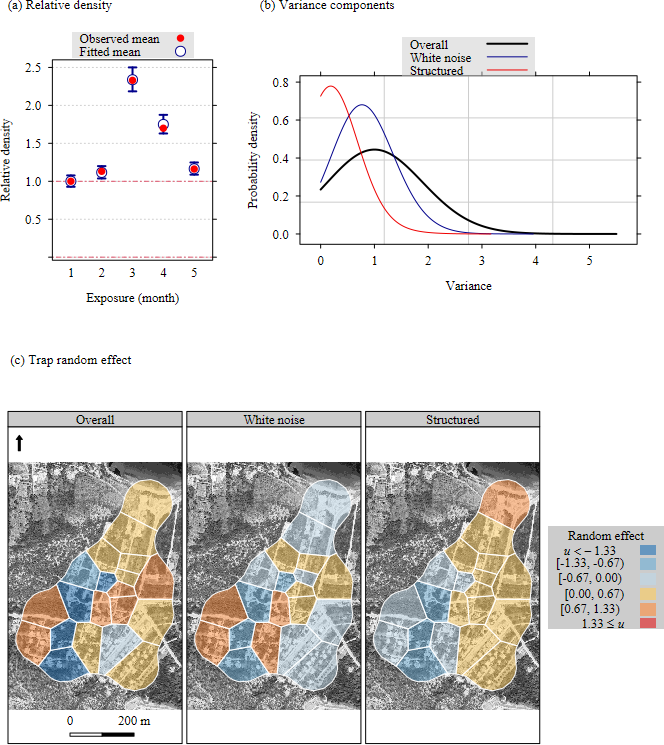


Figure S1: Fitted relative density and spatial random effect for a spatial Poisson model of relative density of eggs of Aedes albopictus monitored with ovi-position traps during a boosted-SIT field experiment implemented from May to November 2023 in Vravrona (Attica, Greece). The white-border polygons were defined by a Voronoi tessellation of trap locations. The background maps in graphs a and b were retrieved from the Google Maps Platform https://mapsplatform.google.com/, using functions available in the ggmap package for R https://github.com/features/packages version 4.0.0, together with a private API key.

### **Adults**


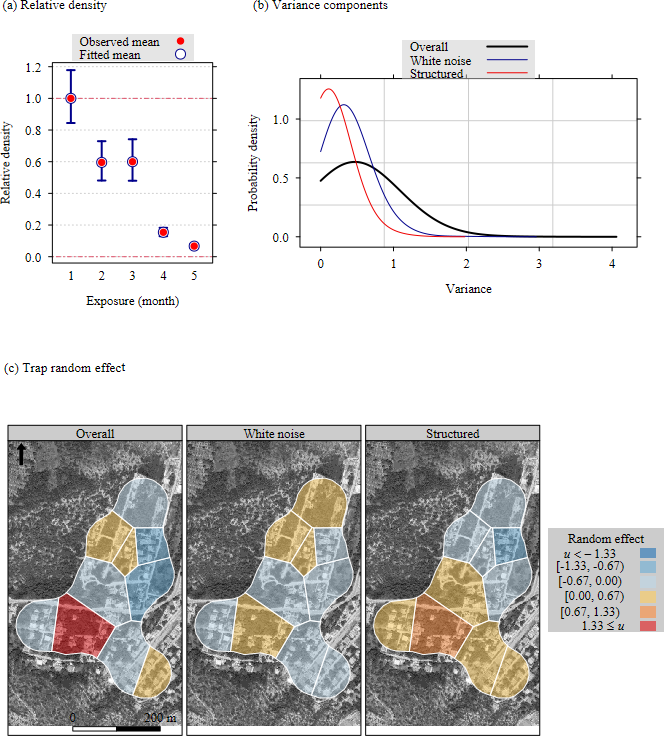


Figure S2: Fitted relative density and spatial random effect for a spatial Poisson model of relative density of adult Aedes albopictus monitored with human landing catches during a boosted-SIT field experiment implemented from May to November 2023 in Vravrona (Attica, Greece). The white-border polygons were defined by a Voronoi tessellation of trap locations. The background maps in graphs a and b were retrieved from the Google Maps Platform https://mapsplatform.google.com/, using functions available in the ggmap package for R https://github.com/features/packages version 4.0.0, together with a private API key.
